# Supplementary material
Source: Springer Nature journal article supplement (https://www.springermedizin.de/resource/supplementary/12978_2009_86_MOESM1_ESM.pdf/9602808)
Supplement: MOESM1 [file 9602808]

ANC mothers  
interviewed

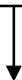

418 men  
recruited

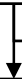

388 men  
interviewed

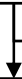

387 included  
in analysis

6 men declined  
24 men absent

1 excluded  
(incomplete  
data)
